# Supplementary material
Source: PubMed Central journal article supplement (PMC9661527)
Supplement: j_hsz-2022-0194_suppl.pdf [file j_hsz-2022-0194_suppl.pdf]

## Extracellular hemin is a reverse use-dependent gating modifier of cardiac voltage-gated Na<sup>+</sup> channels

### – Supplementary Information –

Guido Gessner<sup>a</sup>, Mahdi Jamili<sup>a</sup>, Pascal Tomczyk<sup>b</sup>, Dirk Menche<sup>b</sup>, Roland Schönherr<sup>a</sup>, Toshinori Hoshi<sup>c</sup>, Stefan H. Heinemann<sup>a,\*</sup>

<sup>a</sup> Center for Molecular Biomedicine, Department of Biophysics, Friedrich Schiller University Jena and Jena University Hospital, Jena, Hans-Knöll-Straße 2, 07745 Jena, Germany

<sup>b</sup> Kekulé-Institute for Organic Chemistry and Biochemistry, University of Bonn, Gerhard-Domagk-Straße 1, 53121 Bonn, Germany

<sup>c</sup> Department of Physiology, University of Pennsylvania, Philadelphia, PA 19104-6085, USA

\* Corresponding author

Center for Molecular Biomedicine, Department of Biophysics, Friedrich Schiller University Jena and Jena University Hospital, Hans-Knöll-Straße 2, 07745 Jena, Germany

[stefan.h.heinemann@uni-jena.de](mailto:stefan.h.heinemann@uni-jena.de)

## Supplementary Figures

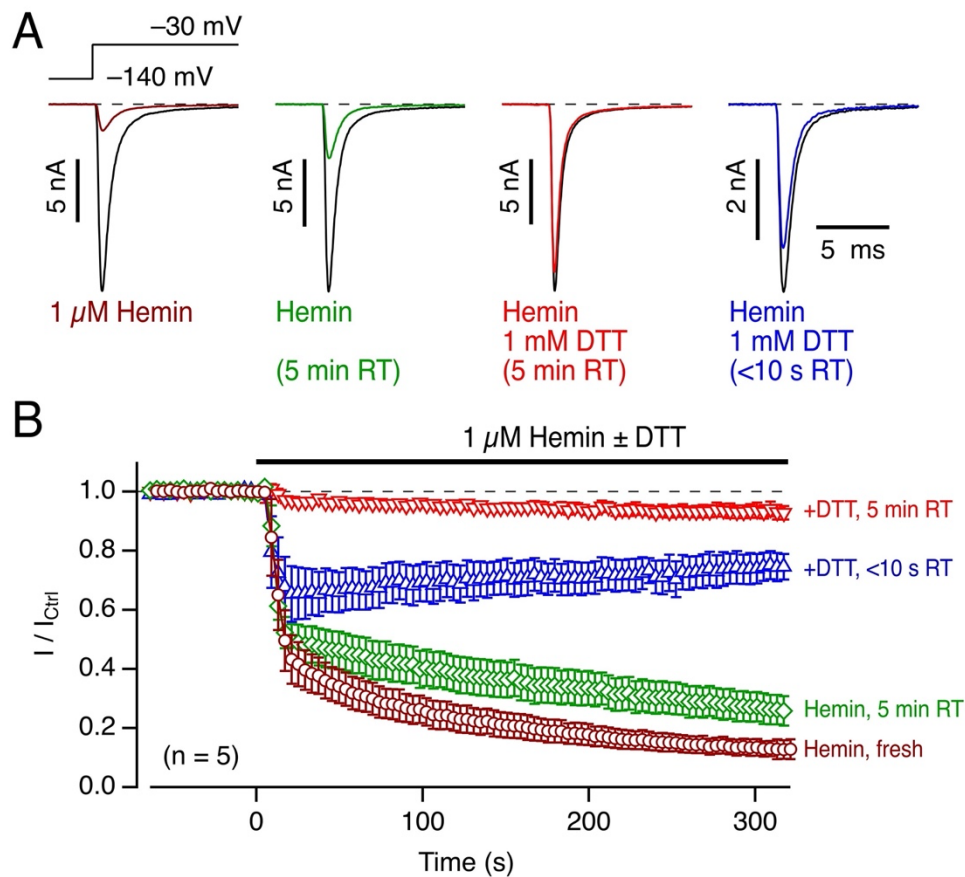**Supplementary Figure 1: Reduction of hemin in the presence of DTT.**

(A) Whole-cell currents mediated by  $Na_v1.5$  channels at  $-30$  mV before (black) and about 5 min after (color) application of fresh  $1 \mu\text{M}$  hemin, hemin after an episode of 5 min at room temperature (RT, green), hemin incubated with  $1 \text{ mM}$  DTT 5 min prior application (red), or incubated with  $1 \text{ mM}$  DTT  $<10$  s prior application (blue). Preincubation was performed at  $5\times$  the concentration to yield  $1 \mu\text{M}$  hemin after bath application. (B) Mean time courses of peak current at  $-30$  mV with hemin application under the conditions of (A): hemin brown circles, hemin after 5 min at RT (green squares), hemin for 5 min in  $1 \text{ mM}$  DTT (red downward triangles), hemin mixed with  $1 \text{ mM}$  DTT  $<10$  s prior to application to the cells. Data are mean  $\pm$  sem.

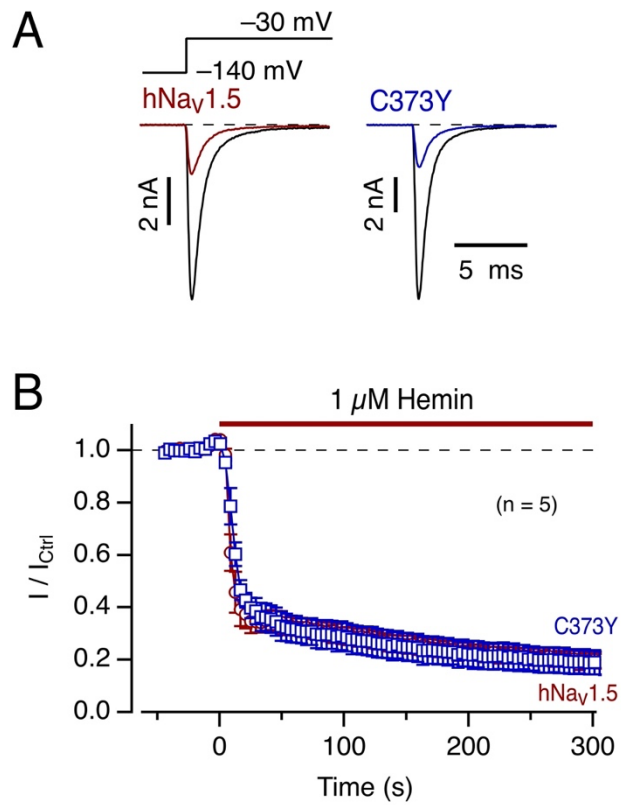

**Supplementary Figure 2: Hemin sensitivity of hNav<sub>v</sub>1.5-C373Y.**

(A) Representative whole-cell currents mediated by Na<sub>v</sub>1.5 channels and the variant C373Y at –30 mV before (black) and about 5 min after (color) application of 1 μM hemin. (B) Mean time courses of peak current at –30 mV with hemin application under the conditions of (A) for hNav<sub>v</sub>1.5 (brown circles) and variant C373Y (blue squares). Data are mean ± sem.

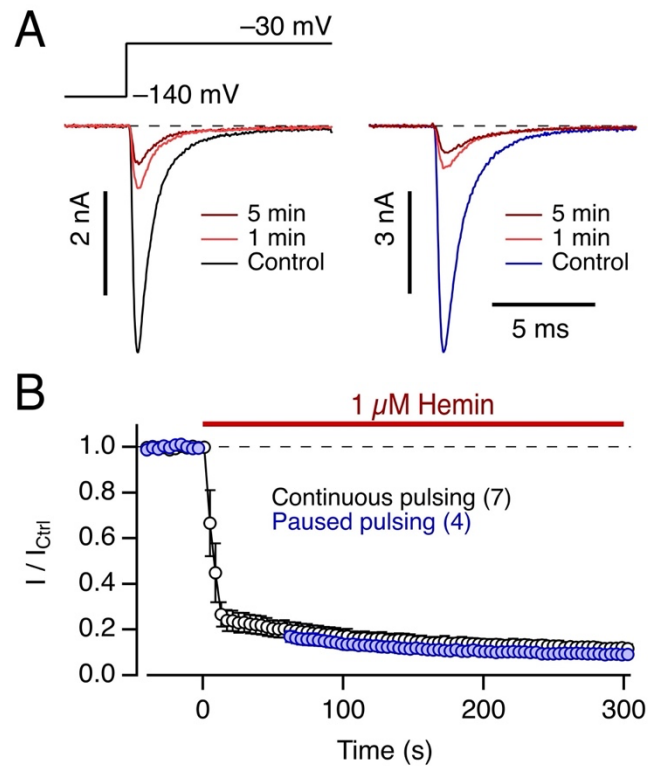

**Supplementary Figure 3: Time course of hemin-induced current inhibition.**

(A) *left*, Whole-cell currents according to the indicated pulse protocol before (black) and 1 and 5 min after application of  $1 \mu\text{M}$  hemin (color). *right*, As in the left panel but with an interruption of current measurements for 1 min starting from hemin application. (B) Mean time courses of the peak currents at  $-30 \text{ mV}$  from experiments as in (A) with continuous pulsing at an interval of 4 s (open, black) and with a 1-min interruption of pulsing (filled, blue). Data are means  $\pm$  sem with  $n$  in parentheses.

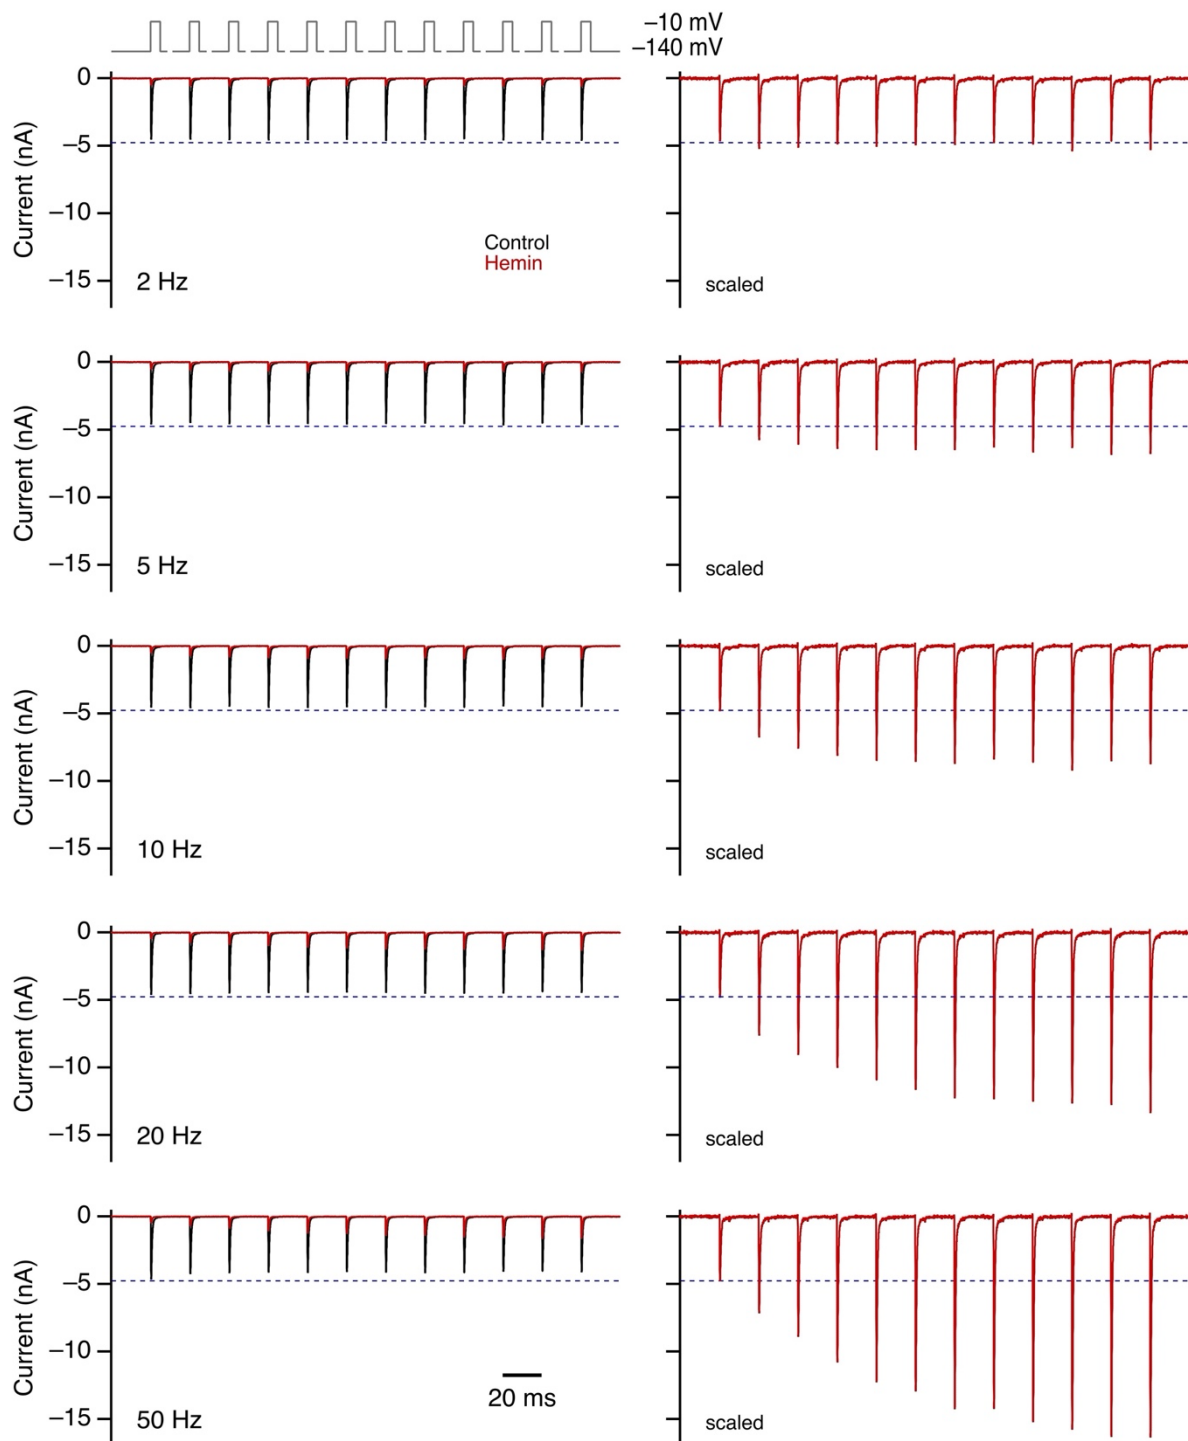**Supplementary Figure 4: Reverse use dependence of hemin-induced current inhibition.**

*left*, Superimposed  $\text{Na}_v1.5$  whole-cell currents before (black) and about 5 min after application of  $1 \mu\text{M}$  hemin (red), stimulated with the indicated pulse protocol. Depolarizing steps to  $-10 \text{ mV}$  always lasted 5 ms, while the interpulse interval at  $-140 \text{ mV}$  (gaps) was adjusted to yield the indicated pulse frequencies. *right*, Current traces in the presence of hemin from the left panels, scaled to match the peak current of the first pulse to the control value (also indicated by the dashed lines).

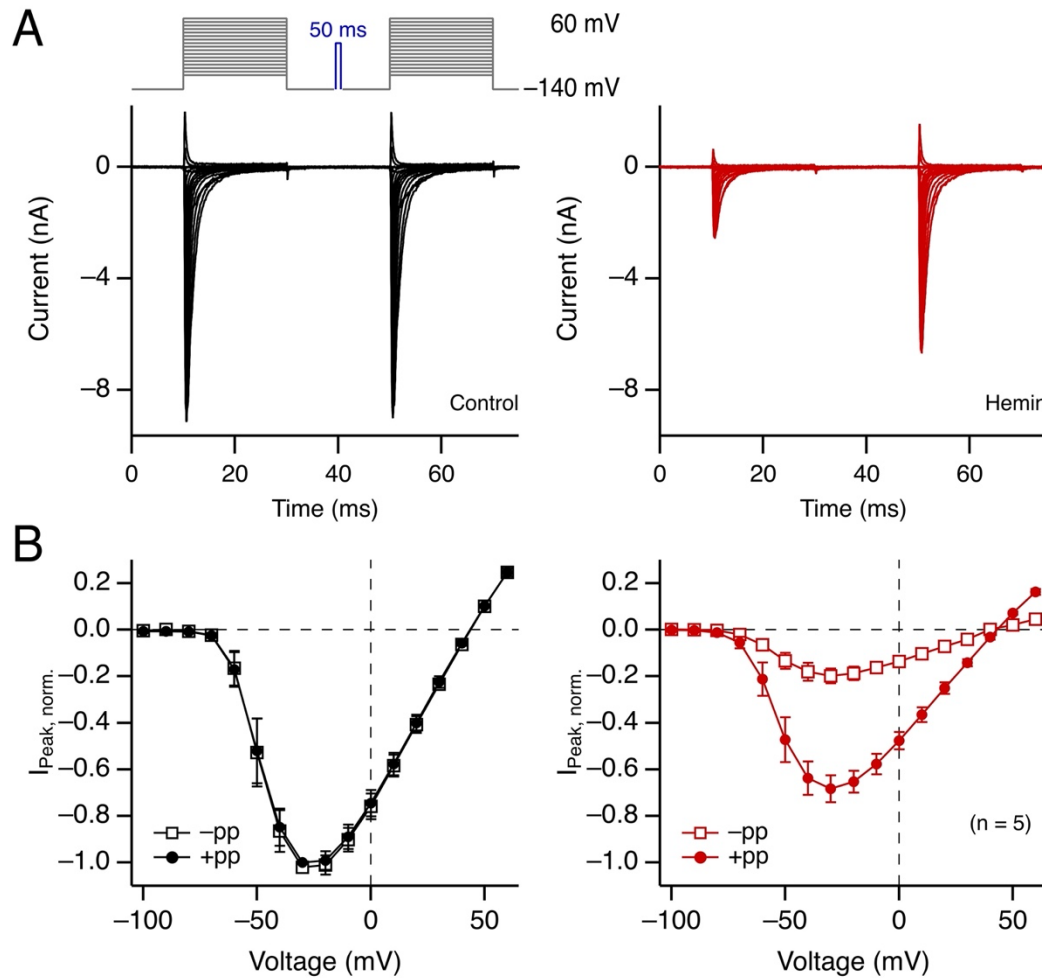

**Supplementary Figure 5: Comparison of current-voltage relationships without and with depolarizing prepulses.**

(A) Superposition of representative hNav1.5 whole-cell currents measured with the indicated two-pulse current-voltage protocol with a prepulse in the center (indicated in blue) of 50 ms at  $-10$  mV; *left* control, *right* with  $1 \mu\text{M}$  hemin. (B) Mean peak currents from experiments as in (A), normalized to the current value at  $-30$  mV with (filled circles) and without prepulse (open squares) as a function of voltage without (*left*) and with  $1 \mu\text{M}$  hemin (*right*). Straight lines connect data points for clarity. Data are mean  $\pm$  sem.

|                       |            |      |         |     |
|-----------------------|------------|------|---------|-----|
| hNav <sub>v</sub> 1.5 | VILSLMELGL | SRMS | NLSVLR  | 808 |
| hNav <sub>v</sub> 1.2 | .SL..M..GL | ANVE | G.....  | 850 |
| rNav <sub>v</sub> 1.2 | .SL..M..GL | ANVE | G.....  | 850 |
| hNav <sub>v</sub> 1.1 | .TL..V..GL | ANVE | G.....  | 859 |
| hNav <sub>v</sub> 1.3 | .SL..M..GL | SNVE | G.....  | 851 |
| hNav <sub>v</sub> 1.4 | .TL..M..GL | ANVQ | G.....  | 669 |
| hNav <sub>v</sub> 1.6 | .SL..M..SL | ADVE | G.....  | 844 |
| hNav <sub>v</sub> 1.7 | .TL..V..FL | ADVE | G.....  | 835 |
| hNav <sub>v</sub> 1.8 | .TV..L..GV | AKK  | GS..... | 756 |

**Supplementary Figure 6: Multiple sequence alignment encompassing Nav channel domain-II S3/S4 linker segments.**

The numbers refer to the last amino acid shown in the peptide sequences, which is the outmost charged residue of the S4 segment (blue). The first 6 residues (green) are part of S3. The relevant residues for this study are highlighted in red (hNav<sub>v</sub>1.5-N803), orange (homologous glycine), or violet (hNav<sub>v</sub>1.8-S751). Dots denote conserved residues within this alignment.

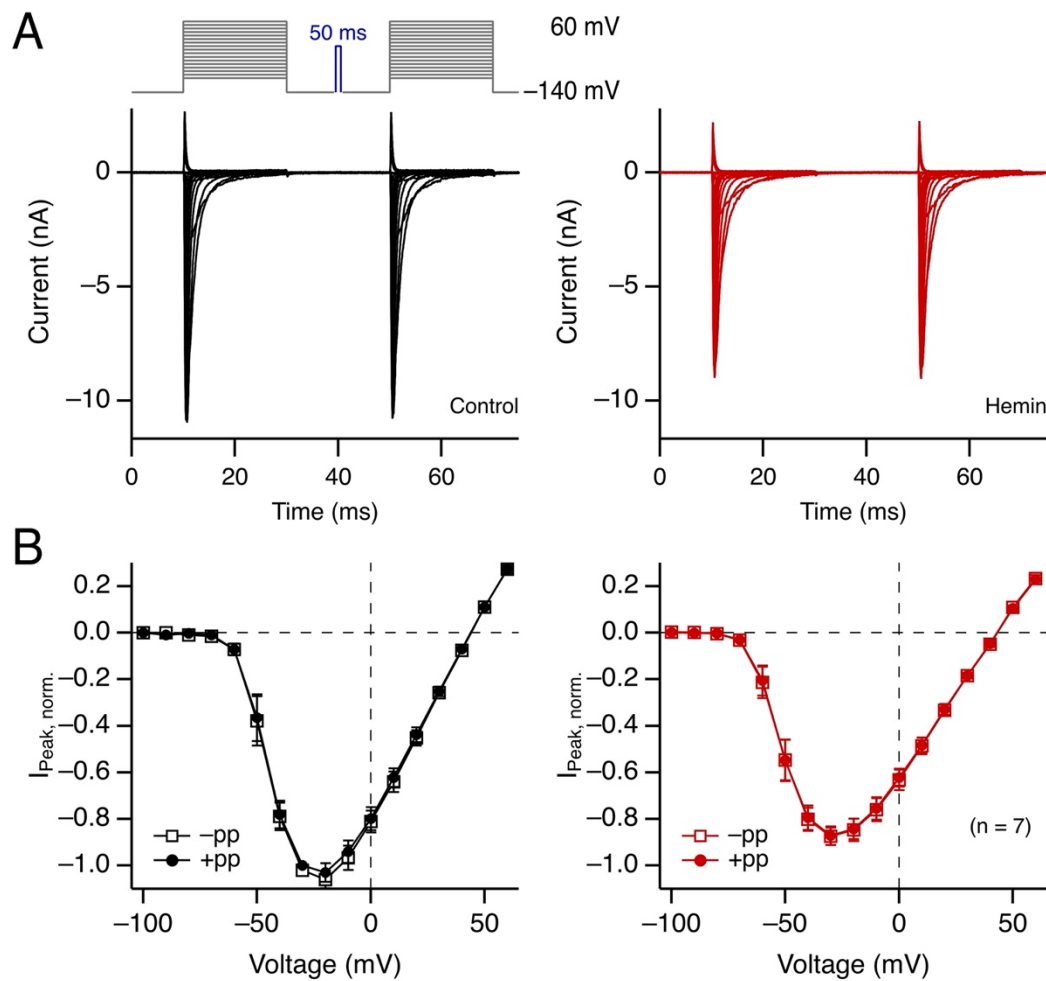

**Supplementary Figure 7: Lack of use dependence in variant hNav1.5-N803G.**

(A) Superposition of representative hNav1.5-N803G whole-cell currents measured with the indicated two-pulse current-voltage protocol with a prepulse in the center (indicated in blue) of 50 ms at  $-10$  mV; *left* control, *right* with  $1 \mu\text{M}$  hemin. (B) Mean peak currents from experiments as in (A), normalized to the current value at  $-30$  mV with (filled circles) and without prepulse (open squares) as a function of voltage without (*left*) and with  $1 \mu\text{M}$  hemin (*right*). Straight lines connect data points for clarity. Data are mean  $\pm$  sem.



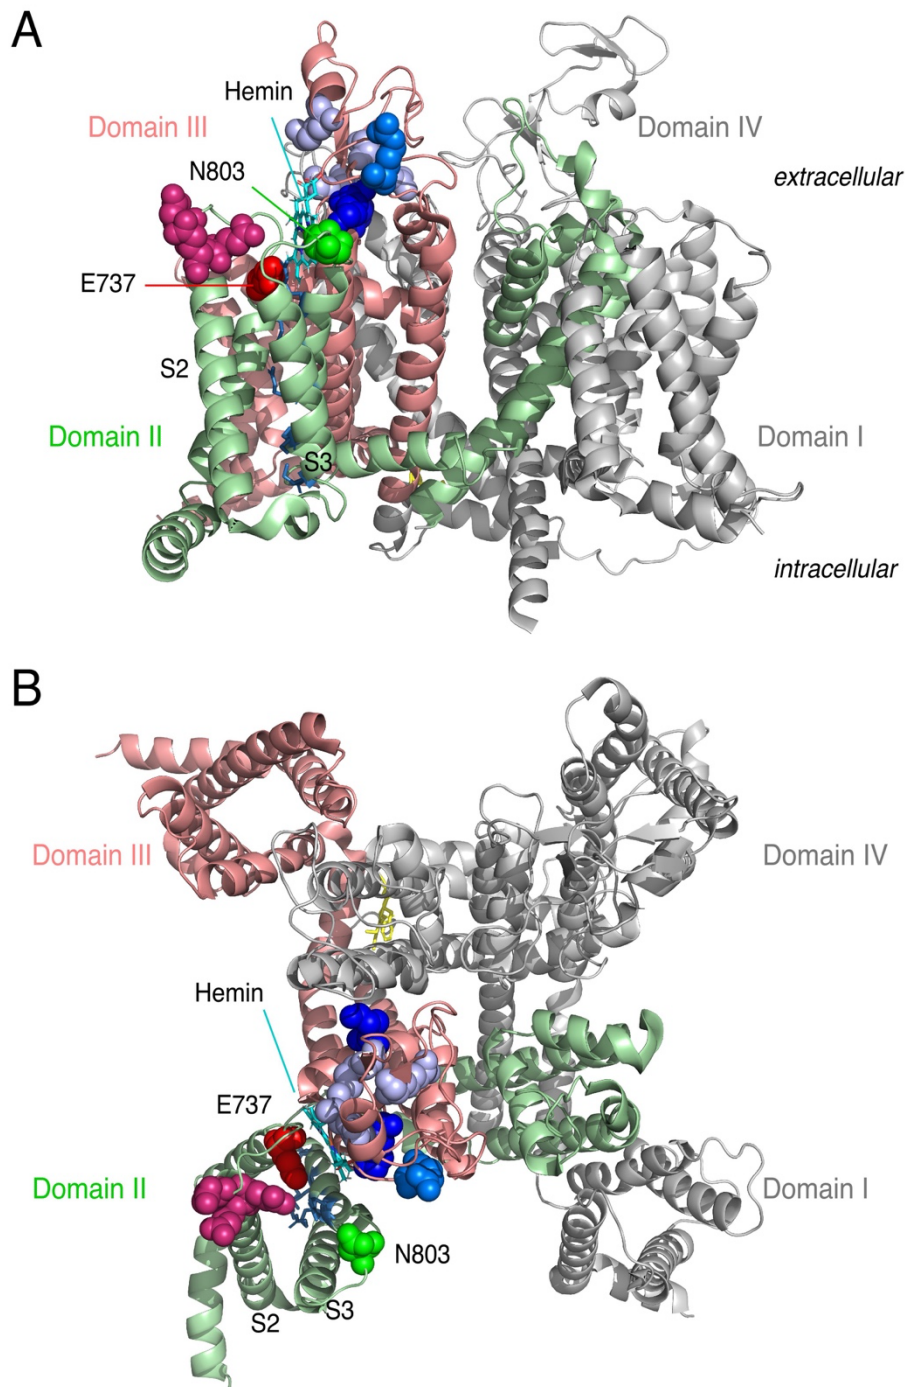

**Supplementary Figure 8: Hypothetical model of hemin–hNav1.5 interaction.**

(A, B) Cryo-EM structural data of human Nav1.5 according to pdb 6LQA with a hypothetical placement of hemin in the cleft between the domain-II voltage sensor and the pore loop of domain III in side view (A) and top/extracellular view (B). Pale green: domain II; salmon: domain III; grey: domains I and IV; green spheres: N803; red spheres: conserved negative charge in domain-II S1/S2 (E737); magenta spheres: negative charges specific for Nav1.5; dark blue spheres: conserved positive charges (K1359, K1399); lighter blue spheres: non-conserved positive charges in Nav1.5; blue sticks: gating charges (3x Arg, 2x Lys) of domain-II S4; yellow sticks: inactivation motif “IFM” in the linker between domains III and IV. Hemin is shown as light blue sticks with red carboxylate groups. No structural optimization performed.
